# Supplementary material for: Increased default mode network activity in socially anxious individuals during reward processing
Source: Biol Mood Anxiety Disord. 2014 Jul 23;4:7. doi: 10.1186/2045-5380-4-7 (PMC4114426; doi:10.1186/2045-5380-4-7)
Supplement: Additional file 2: Table S1 — Main effects of gain > neutral and neutral > gain anticipation contrasts using whole brain analysis. Table S2. Negative associations with social anxiety in gain large > gain small anticipation contrast using whole brain analysis. Table S3. Positive associations with FNE and SAD-New subscales in gain > neutral anticipation contrast using whole brain analysis. Table S4. Main effects of loss > neutral and neutral > loss anticipation contrasts using whole brain analysis. Table S5. Main effects of gain > neutral and neutral > gain outcome contrasts using whole brain analysis. Table S6. Positive associations with social anxiety in gain large > gain small outcome contrast using whole brain analysis. Table S7. Positive associations with FNE and SAD-New subscales in gain > neutral outcome contrast using whole brain analysis. Table S8. Main effects of loss > neutral and neutral > loss outcome contrasts using whole brain analysis. Table S9. Positive associations with FNE and SAD-General subscales in loss > neutral outcome contrast using whole brain analysis. Table S10. Positive associations with social anxiety in gain > loss outcome contrast using whole brain analysis. [file 2045-5380-4-7-S2.xlsx]

## Sheet: Sheet1
Supplementary Table S1. Main effects of gain > neutral and neutral > gain anticipation contrasts using whole brain analysis.
Cluster P-value	Cluster size	Peak Z	x	y	z	Region	R/L
Gain > neutral anticipation
1.31e-81	15897	6.45	-2	2	50	Supplementary motor cortex	L
		6.38	-4	6	48	Supplementary motor cortex	L
		6.27	2	6	50	Supplementary motor cortex	R
		6.18	4	10	48	Paracingulate	R
		6.1	10	10	40	Anterior cingulate cortex	R
		5.94	-48	4	22	Precentral gyrus	L
1.49e-20	9942	5.83	-28	-62	42	Lateral occipital cortex	L
		5.82	-26	-56	38	Superior parietal lobule	L
		5.81	32	-90	6	Occipital pole	R
		5.71	-18	-96	-8	Occipital pole	L
		5.7	32	-66	-16	Occipital fusiform gyrus	R
		5.6	-32	-54	48	Superior parietal lobule	L
7.86e-12	4645	5.02	12	10	-6	Nucleus accumbens	R
		4.94	34	28	-6	Orbitofrontal cortex	R
		4.77	-28	28	2	Orbitofrontal cortex	R
		4.67	-8	8	-4	Nucleus accumbens	L
		4.62	32	26	-2	Insula	R
		4.62	-22	8	2	Putamen	L
Neutral > gain anticipation
9.36e-19	8744	5.77	-18	32	48	Superior frontal gyrus	L
		5.5	-14	36	46	Superior frontal gyrus	L
		5.24	-26	36	40	Middle frontal gyrus	L
		5.2	-18	52	28	Frontal pole	L
		5.19	-10	58	30	Frontal pole	L
		5.11	0	58	10	Frontal pole	L/R
3.35e-12	4842	6.13	-52	-68	28	Lateral occipital cortex	L
		5.93	-46	-68	28	Lateral occipital cortex	L
		5.5	-42	-76	34	Lateral occipital cortex	L
		5.34	-44	-74	38	Lateral occipital cortex	L
		5.32	-50	-62	36	Lateral occipital cortex	L
		4.38	-40	-60	22	Angular gyrus	L
1.79e-07	2557	5.67	-6	-54	28	Posterior cingulate cortex	L
		5.31	-4	-44	32	Posterior cingulate cortex	L
		4.98	-2	-62	20	Precuneus	L
		4.42	-4	-60	8	Precuneus	L
		4.22	6	-54	14	Precuneus	R
		3.77	0	-52	10	Precuneus	L/R
2.86e-06	2046	5.05	54	-64	30	Lateral occipital cortex	R
		4.3	46	-72	36	Lateral occipital cortex	R
		4.26	56	-64	22	Lateral occipital cortex	R
		3.55	62	-28	2	Superior temporal gyrus	R
		3.38	56	-54	40	Angular gyrus	R
		3.35	48	-56	18	Angular gyrus	R
0.00985	804	3.83	-50	28	6	Inferior frontal gyrus	L
		3.68	-44	42	-16	Frontal pole	L
		3.65	-50	32	4	Inferior frontal gyrus	L
		3.15	-54	22	2	Inferior frontal gyrus	L
		3.12	-52	26	-6	Inferior frontal gyrus	L
		3.12	-36	24	-22	Frontal orbital cortex	L
0.028	673	3.36	12	-34	66	Postcentral gyrus	R
		3.35	10	-38	66	Postcentral gyrus	R
		3.22	-8	-28	56	Precentral gyrus	L
		3.17	0	-26	62	Precentral gyrus	L/R
		3.13	2	-28	56	Precentral gyrus	R
		3.11	4	-20	60	Precentral gyrus	R
Supplementary Table S2. Negative associations with social anxiety in gain large > gain small anticipation contrast using whole brain analysis.
Cluster P-value	Cluster size	Peak Z	x	y	z	Region	R/L
Gain large > gain small anticipation
High SA < low SA
0.00744	839	3.66	-10	46	2	Paracingulate	L
		3.13	8	52	-6	Frontal medial cortex	R
		3.13	-4	54	-2	Paracingulate	L
		3.13	8	56	6	Frontal pole	R
		3.1	-6	60	-2	Frontal pole	L
		3.03	-2	52	14	Paracingulate	L
Supplementary Table S3. Positive associations with FNE and SAD-New subscales in gain > neutral anticipation contrast using whole brain analysis.
Cluster P-value	Cluster size	Peak Z	x	y	z	Region	R/L
Gain > neutral anticipation
High FNE > low FNE
0.000176	1368	3.53	32	-52	34	Angular gyrus	R
		3.09	-10	-52	36	Precuneus	L
		3.08	10	-52	20	Precuneus	R
		3.06	-4	-54	28	Posterior cingulate cortex	L
		3.03	-4	-54	24	Posterior cingulate cortex	L
		3	-8	-54	48	Precuneus	L
High SAD-New > low SAD-New
0.00773	836	3.26	-2	-60	44	Precuneus	L
		3.16	-6	-54	38	Precuneus	L
		3.14	-12	-60	50	Precuneus	L
		3.09	-8	-54	48	Precuneus	L
		3.08	-18	-40	36	Callosal body	L
		2.92	-8	-40	48	Precuneus	L
Supplementary Table S4. Main effects of loss > neutral and neutral > loss anticipation contrasts using whole brain analysis.
Cluster P-value	Cluster size	Peak Z	x	y	z	Region	R/L
Loss > neutral anticipation
2.68e-32	18772	5.51	2	2	52	Supplementary motor cortex	R
		5.42	28	-64	50	Lateral occipital cortex	R
		5.37	-28	-62	42	Lateral occipital cortex	L
		5.36	6	16	40	Paracingulate	R
		5.34	6	10	48	Paracingulate	R
		5.26	-16	-92	-8	Occipital pole	L
Neutral > loss anticipation
5.65e-15	6350	4.68	-18	62	16	Frontal pole	L
		4.63	-8	58	-2	Frontal pole	L
		4.59	0	62	8	Frontal pole	L/R
		4.57	-6	64	16	Frontal pole	L
		4.49	-20	30	52	Superior frontal gyrus	L
		4.44	-14	38	48	Superior frontal gyrus	L
0.0073	837	3.91	-6	-56	24	Precuneus	L
		3.45	-14	-48	30	Posterior cingulate cortex	L
		3.27	-4	-46	34	Posterior cingulate cortex	L
		3.24	-2	-64	12	Precuneus	L
		3	8	-58	14	Precuneus	L
		2.97	-6	-60	16	Precuneus	L
0.0128	765	3.52	-54	-66	30	Lateral occipital cortex	L
		3.26	-44	-74	34	Lateral occipital cortex	L
		3.03	-62	-54	26	Angular gyrus	L
		2.94	-64	-48	26	Supramarginal gyrus	L
		2.9	-44	-54	24	Angular gyrus	L
		2.88	-46	-68	28	Lateral occipital cortex	L
Supplementary Table S5. Main effects of gain > neutral and neutral > gain outcome contrasts using whole brain analysis.
Cluster P-value	Cluster size	Peak Z	x	y	z	Region	R/L
Gain > neutral outcome
5.1e-15	6177	6.7	42	-56	48	Angular gyrus	R
		6.41	48	-40	54	Supramarginal gyrus	R
		6.27	46	-48	58	Angular gyrus	R
		6.26	46	-44	56	Supramarginal gyrus	R
		6.11	42	-52	58	Superior parietal lobule	R
		5.82	32	-64	54	Lateral occipital cortex	R
4.21e-10	3608	5.24	34	22	52	Middle frontal gyrus	R
		5.03	52	20	34	Middle frontal gyrus	R
		4.98	48	38	30	Frontal pole	R
		4.97	46	32	36	Middle frontal gyrus	R
		4.96	42	28	44	Middle frontal gyrus	R
		4.94	46	30	42	Middle frontal gyrus	R
Neutral > gain outcome
3.12e-30	16589	5.96	6	2	64	Supplementary motor cortex	R
		5.67	10	-18	50	Precentral gyrus	R
		5.6	-40	-12	58	Precentral gyrus	L
		5.59	-40	-14	62	Precentral gyrus	L
		5.24	6	2	58	Supplementary motor cortex	R
		5.22	-4	6	48	Supplementary motor cortex	L
3.68e-23	11335	6.1	10	-18	6	Thalamus	R
		5.7	-6	-22	4	Thalamus	L
		4.88	-22	-92	-8	Occipital pole	L
		4.82	-16	-92	-8	Occipital pole	L
		4.68	-6	-26	-2	Thalamus	L
		4.65	-36	-92	0	Occipital pole	L
0.0149	708	3.95	-32	50	26	Frontal pole	L
		3.87	-34	44	30	Frontal pole	L
		3.69	-30	40	30	Frontal pole	L
		3.46	-32	42	40	Frontal pole	L
		3.46	-24	54	40	Frontal pole	L
		3.45	-26	40	38	Frontal pole	L
Supplementary Table S6. Positive associations with social anxiety in gain large > gain small outcome contrast using whole brain analysis.
Cluster P-value	Cluster size	Peak Z	x	y	z	Region	R/L
Gain large > gain small outcome
High SA > low SA
0.00205	947	3.78	-8	-72	2	Lingual gyrus	L
		3.71	-16	-76	-6	Lingual gyrus	L
		3.41	-20	-80	-10	Occipital fusiform gyrus	L
		3.07	-18	-78	0	Lingual gyrus	L
		2.81	-48	-74	2	Lateral occipital cortex	L
		2.79	-18	-66	-12	Lingual gyrus	L
0.00835	769	3.16	10	-84	14	Intracalcarine cortex	R
		3.01	-16	-88	16	Lateral occipital cortex	L
		3	-30	-84	26	Lateral occipital cortex	L
		2.92	-20	-90	18	Lateral occipital cortex	L
		2.9	-24	-92	18	Occipital pole	L
		2.88	-30	-100	0	Occipital pole	L
0.012	725	3.54	38	-48	54	Superior parietal lobule	R
		3.28	36	-40	60	Superior parietal lobule	R
		3.05	40	-30	68	Postcentral gyrus	R
		2.92	20	-58	52	Lateral occipital cortex	R
		2.78	54	-30	50	Supramarginal gyrus	R
		2.75	24	-60	44	Lateral occipital cortex	R
Supplementary Table S7. Positive associations with FNE and SAD-New subscales in gain > neutral outcome contrast using whole brain analysis.
Cluster P-value	Cluster size	Peak Z	x	y	z	Region	R/L
Gain > neutral outcome
High FNE > low FNE
1.38e-10	3828	4	8	-46	64	Precuneus	R
		3.98	-10	-40	54	Postcentral gyrus	L
		3.93	-24	-44	54	Superior parietal lobule	L
		3.72	-36	-42	54	Superior parietal lobule	L
		3.58	-52	-32	50	Supramarginal gyrus	L
		3.51	-38	-46	34	Supramarginal gyrus	L
0.00682	802	3.74	-50	-78	14	Lateral occipital cortex	L
		3.52	-46	-82	4	Lateral occipital cortex	L
		3.31	-30	-88	16	Lateral occipital cortex	L
		3.28	-48	-74	12	Lateral occipital cortex	L
		3.18	-54	-74	14	Lateral occipital cortex	L
		3.16	-36	-88	8	Lateral occipital cortex	L
0.026	640	3.52	30	-2	60	Middle frontal gyrus	R
		3.49	26	10	56	Superior frontal gyrus	R
		3.47	48	2	56	Precentral gyrus	R
		3.44	26	10	66	Superior frontal gyrus	R
		3.36	44	0	60	Middle frontal gyrus	R
		3.12	36	-2	66	Middle frontal gyrus	R
High SAD-New > low SAD-New
2.98e-07	2332	3.94	-34	-44	52	Superior parietal lobule	L
		3.79	-54	-34	50	Supramarginal gyrus	L
		3.75	8	-50	58	Precuneus	R
		3.67	-30	-50	44	Superior parietal lobule	L
		3.56	-34	-52	46	Superior parietal lobule	L
		3.46	-36	-54	54	Superior parietal lobule	L
Supplementary Table S8. Main effects of loss > neutral and neutral > loss outcome contrasts using whole brain analysis.
Cluster P-value	Cluster size	Peak Z	x	y	z	Region	R/L
Loss > neutral outcome
6e-13	4953	4.8	52	-40	46	Supramarginal gyrus	R
		4.72	42	-56	46	Angular gyrus	R
		4.67	46	-44	56	Supramarginal gyrus	R
		4.54	-2	-80	46	Precuneus	L
		4.42	40	-54	62	Superior parietal lobule	R
		4.21	36	-54	34	Angular gyrus	R
3.37e-09	3134	4.62	4	38	44	Superior frontal gyrus	R
		4.31	0	48	40	Superior frontal gyrus	R
		4.15	4	50	26	Superior frontal gyrus	R
		4.1	2	40	30	Paracingulate	R
		3.97	2	28	40	Paracingulate	R
		3.93	4	32	42	Paracingulate	R
1.24e-08	2884	5.08	48	16	44	Middle frontal gyrus	R
		4.65	54	22	18	Inferior frontal gyrus	R
		4.63	52	18	32	Middle frontal gyrus	R
		4.59	52	20	22	Inferior frontal gyrus	R
		4.51	48	34	24	Middle frontal gyrus	R
		4.38	52	20	14	Inferior frontal gyrus	R
9.54e-06	1725	4.31	-30	-54	36	Superior parietal lobule	L
		4.05	-46	-42	62	Superior parietal lobule	L
		3.68	-32	-52	46	Superior parietal lobule	L
		3.55	-52	-32	54	Postcentral gyrus	L
		3.36	-44	-46	56	Superior parietal lobule	L
		3.35	-24	-58	46	Superior parietal lobule	L
Neutral > loss outcome
1.61e-10	3743	4.93	0	-32	62	Precentral gyrus	L/R
		4.76	-2	-26	60	Precentral gyrus	L
		4.71	4	-24	66	Precentral gyrus	R
		4.58	4	-36	64	Postcentral gyrus	R
		4.57	4	-20	64	Precentral gyrus	R
		4.23	-24	-22	64	Precentral gyrus	L
Supplementary Table S9. Positive associations with FNE and SAD-General subscales in loss > neutral outcome contrast using whole brain analysis.
Cluster P-value	Cluster size	Peak Z	x	y	z	Region	R/L
Loss > neutral outcome
High FNE > low FNE
0.00158	978	3.37	-4	6	62	Supplementary motor cortex	L
		3.17	10	-20	58	Precentral gyrus	R
		3.08	20	10	58	Superior frontal gyrus	R
		3	6	10	52	Paracingulate	R
		2.95	18	4	60	Superior frontal gyrus	R
		2.91	8	4	52	Supplementary motor cortex	R
High SAD-General > low SAD-General
0.00229	926	4.01	-4	-46	38	Posterior cingulate cortex	L
		3.35	-8	-66	26	Precuneus	L
		3.28	-4	-52	10	Precuneus	L
		2.84	-4	-36	44	Posterior cingulate cortex	L
		2.84	-4	-48	28	Posterior cingulate cortex	L
		2.83	0	-52	22	Posterior cingulate cortex	L/R
0.0291	617	3.57	-38	-80	42	Lateral occipital cortex	L
		3.5	-40	-68	52	Lateral occipital cortex	L
		3.17	-34	-72	36	Lateral occipital cortex	L
		3.06	-36	-68	42	Lateral occipital cortex	L
		2.99	-38	-64	40	Lateral occipital cortex	L
		2.71	-34	-66	34	Lateral occipital cortex	L
Supplementary Table S10. Positive associations with social anxiety in gain > loss outcome contrast using whole brain analysis.
Cluster P-value	Cluster size	Peak Z	x	y	z	Region	R/L
Gain > loss outcome
High SA > low SA
0.000489	1008	3.51	-56	-38	52	Supramarginal gyrus	L
		3.47	-42	-48	56	Superior parietal lobule	L
		3.37	-48	-40	52	Supramarginal gyrus	L
		3.33	-38	-70	46	Lateral occipital cortex	L
		3.33	-50	-36	50	Supramarginal gyrus	L
		3.31	-32	-60	44	Lateral occipital cortex	L
